# Supplementary material
Source: HighWire-hosted journal article supplement (https://bmjopen.bmj.com/content/12/1/e055475)
Supplement: inline-supplementary-material-1 [file inline-supplementary-material-1.pdf]

18-090780-01 HEE – Questionnaire 4 ACPs

**Questionnaire 4 – Individuals working in advanced clinical practice  
VERSION 16**

Thank you for taking the time to complete this survey about advanced clinical practice which is part of a wider piece of work being undertaken by HEE along with NHSE and NHSi and being conducted by Ipsos MORI.

Those working at advanced clinical practice level play a critical role in enhancing capacity and capability within multi professional teams, and come from a range of professional backgrounds such as nursing, midwifery, allied health professionals, and pharmacy (job titles may include Extended Scope Practitioners ESP's in Physiotherapy, OT, Pharmacy, and Podiatry Practitioners as well as many others).

They are healthcare professionals educated to Masters level and have developed the skills and knowledge to allow them to take on expanded roles and scope of practice caring for patients. It is anticipated that the role of advanced practice staff will continue to develop and increase in importance over the coming years.

To help develop and improve their policies relating to advanced clinical practice, Health Education England is keen to understand the roles and experiences of staff working at advanced clinical practice level. The more people we hear from, the more we learn about what is working well and what could be improved.

For more information, a link to Health Education England's multi-professional framework for advanced clinical practice in England (2017) can be found [here](#).

We have also produced a short webinar about the purpose of this research, which can be found [here](#). This may help with completing the survey.

Please note, this survey should only be completed if it has been sent to you by your **Manager or Professional Lead** via your **ACP Organisational Lead** (or your named Organisational Lead for completing this survey).

**NEXT BUTTON**

**Privacy Notice**

**How your data will be used**

Health Education England have invited you to take part in this survey, and as a potential participant it's important that you are informed on how your personal data will be used and your rights under GDPR.

To process your data Ipsos MORI ("the processor") and Health Education England ("the controller") require a legal basis to do so. For this survey the legal basis for the processing of your personal data is your consent.

Responding to this survey is entirely voluntary and you can choose to withdraw your consent at any time. If you would like to withdraw your consent at any point please contact [healtheducationacp@ipsos.com](mailto:healtheducationacp@ipsos.com) or call Ipsos MORI on Freephone 0800 141 3657.

You also have the right to object to, or restrict the processing of your personal data at any time. To do so please email [gdpr@hee.nhs.uk](mailto:gdpr@hee.nhs.uk).

## 18-090780-01 HEE – Questionnaire 4 ACPs

The personal data which may be collected in this survey includes your name, age, gender, email address and job title. However, you do not need to provide this information if you do not wish to and there are answer options in the survey that will allow you to remain anonymous.

Data from this survey may be reported at various levels including organisation/trust level, STP/ICS level and by profession and speciality. Some verbatim answers submitted as part of this survey will also be passed on to HEE for their own analysis purposes. However, no personal data or information submitted as part of this survey will be passed on to your employer.

Data collected through this survey will be retained for 3 months with personal data held for up to 12 months after completion of the research and will be deleted via secure methods. For more information on your rights please see Health Education England's privacy notice [here](#).

Toward the end of the survey you will also be asked if you consent to taking part in further research and other work on advance clinical practice. If you choose to do so, your personal data will be shared with Health Education England and this information will be held for up to 12 months.

**NEXT BUTTON****How to complete this survey**

The information you provide will be held in the strictest confidence and no one will be able to identify you from the results, unless you include any personal identifiable information in the free text comments.

Depending on the extent of your comments, this questionnaire should only take around **25 minutes** to complete.

**If you are happy to do so please select “I would like to provide an email address”. EMAIL ADDRESS BOX.**

**1. I would like to provide an email address.**

If you need to change any of your answers, please use the back button to go back and change previous responses.

If you need help completing this survey, please let us know by emailing [healtheducationacp@ipsos.com](mailto:healtheducationacp@ipsos.com) or calling Ipsos MORI on Freephone 0800 141 3657.

**CONSENT BUTTON:** I agree to participate in the survey and provide data about advanced clinical practice and understand that participation is voluntary and I can change my mind at any time.

By clicking the button, you agree to participate in the survey about advanced clinical practice and understand that participation is voluntary and you can change your mind at any time.

**ASK ALL****Q1 Which of the following types of organisations do you work for?****MULTICODE**

1. Primary care trust
2. Acute trust
3. Community trust
4. Mental health trust

18-090780-01 HEE – Questionnaire 4 ACPs

5. Learning Disability trust
6. Other NHS commissioned Service
7. Independent Sector HC provider
8. Ambulance trust
9. Other - please write in (SPECIFY)
10. Don't know – THANK AND CLOSE

**IF MORE THAN ONE CODE IS SELECTED AT Q1 ASK Q2**

**Q2 And which of these is your main employer? By main employer I mean the employer that you spend most of your time working for, excluding any paid or unpaid overtime.**

**SINGLE CODE**

**INSERT Q1 RESPONSES. ADD CODE FOR**

- I am contracted for the same number of hours in each of these organisations.

**IF ONLY ONE ORGANISATION SELECTED AT Q1, PLEASE ASK ALL QUESTIONS (Q3a -Q57). IF MORE THAN ONE EMPLOYER SELECTED AT Q1 PLEASE ASK ALL QUESTIONS FOR MAIN EMPLOYER THEN A LOOP OF Q3A, Q3B, Q4, Q6, Q10 FOR EACH ORGANISATION SELECTED.**

**IF MORE THAN ONE ORGANISATION SELECTED AT Q1 AND COULD IDENTIFY MAIN ONE AT Q2 SHOW THIS MESSAGE:**

The following questions refer to the <<ENTER CODE FROM Q2>> you work in which you have selected as your main employer. At a later stage in the survey you will be asked about the other organisation(s) you work for.

**IF Q2= I am contracted for the same number of hours in each of these organisations, THEN CHOOSE ONE EMPLOYER AT RANDOM AND SHOW THIS MESSAGE:**

The following questions refer to the <<RANDOMLY SELECTED EMPLOYER>> you work for. At a later stage in the survey you will have the option to answer questions about the other organisation(s) you work for.

**FOR MORE THAN ONE EMPLOYER: START OF NEW LOOP**

**REPEAT LOOP FOR EACH EMPLOYER SELECTED AT Q1 AND WAS NOT SELECTED AS MAIN EMPLOYER IN Q2**

**The next few questions refer to your work in [INSERT ORGANISATION SELECTED AT Q2]**

**ASK ALL. FOR MAIN EMPLOYER AND SUBSEQUENT LOOP(S).**

**Q3A Which area does your <INSERT ORGANISATION SELECTED> fall under?**

**SINGLE CODE**

1. North
2. Midlands and East
3. London
4. South

CHOOSE FROM DATABASE. FILTER BASED ON ANSWER TO Q3A. ADD INSTRUCTIONS FOR SEARCHING.

18-090780-01 HEE – Questionnaire 4 ACPs

**ASK ALL FOR MAIN EMPLOYER AND SUBSEQUENT LOOP(S)**

**Q3B What is the name of your organisation? Please choose from the following list.**

CHOOSE FROM DATABASE – FILTER BASED ON ANSWER TO Q2A. ADD INSTRUCTIONS FOR SEARCHING.

1. Other (please write in)

**ASK ALL FOR MAIN EMPLOYER AND SUBSEQUENT LOOP(S)**

**Q4 What is the name of your STP/ICS? Please choose from the following list.**

1. I work outside of these STPS – i.e. in Wales or Scotland
2. Other – please write in (SPECIFY)

**ASK ALL FOR MAIN EMPLOYER ONLY (EXCLUDE FROM SUBSEQUENT LOOP(S))**

**Q5 To which of the following professional groups do you belong?**

Please note - by providing an answer to this question you may make yourself identifiable to Health Education England. **If you do not wish to answer this question, please select 'prefer not to say'.**

**MULTICODE**

- **Allied Health Professionals**

- Art Therapist
- Drama Therapist
- Music Therapist
- Podiatrist
- Dietitian
- Occupational Therapist
- Operating Department Practitioner
- Orthoptist
- Osteopath
- Paramedic
- Physiotherapist
- Prosthetist and orthotists
- Diagnostic Radiographer
- Therapeutic Radiographer
- Speech and language therapist

- **Midwife**

- **Nurse**

- Adult
- Paediatric
- Mental health
- Learning disability
- District Nursing
- Public Health Nursing (school nurse or health visitor)

Other (please specify)

- **Health Care Sciences**

- Clinical Scientist - Life Sciences

## 18-090780-01 HEE – Questionnaire 4 ACPs

- Clinical Scientist - Physical Sciences
  - Clinical Scientist - Physiological Sciences
  - Clinical Scientist - Bioinformatics and Digital Healthcare Sciences
- **Optometrist**
- **Pharmacist**
  - Clinical pharmacist
  - Community pharmacist
- **Psychological professions**
  - Clinical Psychologist
  - Counselling Psychologist
  - Forensic Psychologist
  - Health Psychologist
  - High Intensity Therapist
  - Psychological Wellbeing Practitioner
  - Counsellor
  - Cognitive Behaviour Therapist
  - Systemic Family Therapist
  - Adult Psychotherapist
  - Child Psychotherapist
  - Children's Wellbeing Practitioners
  - Other - please write in (SPECIFY)
- **Dental**
  - Dental nurse
  - Other – please write in (SPECIFY)
- Other – please write in (SPECIFY)
- None of these – CLOSE THE QUESTIONNAIRE .
- Prefer not to say

**ASK ALL FOR MAIN EMPLOYER AND SUBSEQUENT LOOP(S)**

**Q6 Below is a list of clinical specialities, please tell us which one(s) you work in, and your specific area within it.**

1. Emergency medicine (including urgent and emergency care) - please write in (SPECIFY)
2. Acute Medical – please write in (SPECIFY)
3. Medical specialities (e.g. gastro, cardio-vascular, respiratory, stroke etc) – please write in (SPECIFY)
4. Surgery – please write in (SPECIFY)
5. Critical Care – please write in (SPECIFY)
6. Neonates – please write in (SPECIFY)
7. Paediatrics – please write in (SPECIFY)
8. Older people – please write in (SPECIFY)
9. Ophthalmology – please write in (SPECIFY)
10. Musculoskeletal services (including orthopaedics, primary care etc) – please write in (SPECIFY)
11. Mental health – please write in (SPECIFY)
12. Cancer – please write in (SPECIFY)
13. Diagnostics (e.g. ultrasound, reporting radiographers etc) – please write in (SPECIFY)
14. Learning disability – please write in (SPECIFY)
15. Obstetrics and gynae – please write in (SPECIFY)
16. Community care (health and care) – please write in (SPECIFY)

18-090780-01 HEE – Questionnaire 4 ACPs

17. Primary care – please write in (SPECIFY)
18. Dental – please write in (SPECIFY)
19. Other – please write in (SPECIFY)
20. None of these (SINGLE CODE)
21. Don't know (SINGLE CODE)
22. Prefer not to say

**ASK ALL FOR MAIN EMPLOYER ONLY (EXCLUDE FROM SUBSEQUENT LOOP(S))**

**Q9 What is your current level of working practice?**

**SINGLE CODE**

1. Working at Trainee advanced clinical practitioner level
2. Working at advanced clinical practitioner level
3. Working at Trainee consultant practitioner level
4. Working at consultant practitioner level
5. Other – please write in (SPECIFY)
6. Prefer not to say

**ASK ALL FOR MAIN EMPLOYER AND SUBSEQUENT LOOP(S)**

**Q10 What is your job title (or titles, if you hold more than one role)?** Please note that your answers will be shared with Health Education England and therefore your answer may make you identifiable. If you would rather not answer this question, please click 'I would prefer not to say' and press next.

**OPEN ENDED**

- I would prefer not to say

**LOOP(S) FOR OTHER EMPLOYERS ENDS HERE.**

**ASK ALL**

**Q11 Do you have a job description for your current role?**

**SINGLE CODE**

1. Yes, I do have a job description
2. No, I do not have a job description
3. Don't know

**IF YES AT Q11**

**Q12 When was the last time your job description was reviewed?**

**SINGLE CODE**

1. Within the last 6 months
2. 6 months ago, but less than a year
3. 1 year ago, but less than two years
4. Two years ago or more
5. My job description has never been reviewed
6. Don't know

**ASK THOSE WHO HAD THEIR JOB DESCRIPTION REVIEWED WITHIN THE LAST TWO YEARS – Q12**

**Q13 Were you personally involved in the review of your job description?**

**SINGLE CODE**

1. Yes
2. No
3. Don't know

18-090780-01 HEE – Questionnaire 4 ACPs

**ASK ALL**

**Q14 Does your job description cover the following areas?**

**MULTICODE**

1. Leadership and management
2. Research (service development and evaluation)
3. Education
4. Advanced Clinical Practice
5. Scope of your practice
6. None of these
7. Don't know

**ASK ALL**

**Q15 Do you currently have a job plan?**

**SINGLE CODE**

1. Yes
2. No
3. Don't know

**IF CODED 1 AT Q15**

**Q16 Does your job plan separate out the clinical elements of your role from the non-clinical elements (e.g. research)? By clinical we mean the direct and indirect contact you have with patients**

**SINGLE CODE**

1. Yes
2. No
3. Don't know

**IF CODED 1 AT Q16**

**Q17 Is the non-clinical part of your job plan protected?**

**SINGLE CODE**

1. Yes – all of the time
2. Yes – some of the time
3. No – not protected
4. Don't know

**ASK ALL**

**Q18 Before today, how much, if anything, would you say you know about Health Education England's multi-professional framework for advanced clinical practice?**

**SINGLE CODE**

1. A great deal
2. A fair amount
3. Just a little
4. Heard of, know nothing about
5. Never heard of
6. Don't know

**IF CODE 3, 4 AND 5 AT Q18 SHOW DEFINITION**

## 18-090780-01 HEE – Questionnaire 4 ACPs

The following questions link to the multi-professional advanced clinical practice framework and you can find this link at the beginning of the questionnaire.

**Definition of advanced practice:**

“Advanced clinical practice is delivered by experienced, registered health and care practitioners. It is a level of practice characterised by a high degree of autonomy and complex decision making. This is underpinned by a master’s level award or equivalent that encompasses the four pillars of clinical practice, leadership and management, education and research, with demonstration of core capabilities and area specific clinical competence.

Advanced clinical practice embodies the ability to manage clinical care in partnership with individuals, families and carers. It includes the analysis and synthesis of complex problems across a range of settings, enabling innovative solutions to enhance people’s experience and improve outcomes.”

The four pillars (taken from the multi-professional framework for advanced clinical practice in England):

This framework requires that health and care professionals working at the level of advanced clinical practice should have developed and can evidence the underpinning competencies applicable to the specialty or subject area, i.e. the knowledge, skills and behaviours relevant to the health and care professional’s setting and job role. The core capabilities **across the four pillars...**

- clinical practice
- leadership and management
- education
- research

...are then applied to these specialist competencies. These may be manifested/demonstrated in different ways depending on the profession, role, population group, setting and sector in which an individual is practising.

**ASK ALL****Q19 Are you working to align yourself with the capabilities in the HEE multi-professional framework?**

1. Yes – I already aligned to the capabilities
2. Yes – I have a developmental plan in place
3. No – I am not currently working towards aligning myself with the capabilities in the framework
4. No – I don’t think the capabilities apply to my job role.
5. Don’t know

**IF CODE 3 and 4 AT Q19****Q20 Have you reviewed the HEE multi-professional capabilities with your employer?**

1. Yes
2. No
3. Don’t know

**ASK ALL****Q21 Are you evidencing the impact of your role in each of the following areas?**

1. Leadership and management
2. Research (Service Development and evaluation)



18-090780-01 HEE – Questionnaire 4 ACPs

3. Education
4. Advanced Clinical Practice
5. I am not evidencing my role in any of these areas.
6. Don't know

**ALL WHO ARE EVIDENCING THE IMPACT OF THEIR ROLE AT Q21 (CODES 1, 2, 3, 4)**

**Q22 Overall, are you using this evidence...**

1. For appraisals
2. Internally as part of service line reporting
3. Professional body accreditation of advanced level practice
4. Externally through posters and publications
5. In another way – please write in (SPECIFY)
6. None of these
7. Don't know

### **Education**

The next section is about the types of formal and informal education you may be receiving regarding advanced clinical practice, including consultant practitioners.

**ASK ALL**

**Q23A Which, if any, of the following types of formal learning and development are you currently completing?**

**MULTICODE**

1. Full Masters (PG cert and PG Dip)
2. Specific modules
3. Royal College (credential)
4. Credentialing other
5. None of these
6. Don't know

**ASK IF CODED 1, 2, 3, 4, at Q23A**

**Q23B What is the name of the module or programme of study you are currently undertaking?**

**OPEN ENDED**

1. Don't know

**ASK IF CODED 1, 2, 3, 4, at Q23A**

**Q24 How many days study leave did your employer agree to give you to support you in undertaking this course? When answering this question please think about the leave given to you over the whole duration of the course.**

1. I was not given any study leave days
2. Less than 1 day (e.g. half a day)
3. 1-4 days
4. 5-9 days
5. 10-19
6. 20-29
7. 30+ days
8. Don't know

**IF GIVEN TIME AT Q24 (codes 2-7)**

18-090780-01 HEE – Questionnaire 4 ACPs

**Q25 Since agreeing the amount of time you could have for study leave, to what extent has your employer been able to honour this arrangement?**

1. Fully
2. Partially
3. Hardly at all
4. Not at all
5. Don't know

**ASK ALL**

**Q26 To what extent have your advance education and training opportunities prepared you for the reality of your job role?**

- A great deal
- A fair amount
- Not very much
- Not at all

**ASK ALL**

**Q28 Which, if any, other education and training options are open to you within your organisation?**

1. Joining in junior doctor training
2. Other advanced clinical practitioner learning
3. Other medical training
4. Training provided by your trust / organisation
5. Other
6. None of these

**ASK ALL**

**Q29 In an average month what proportion of your total work time is spent delivering training to others?**

1. I do not deliver learning to others
2. 1-9%
3. 10-19%
4. 20-29%
5. 30-39%
6. 40-49%
7. 50-59%
8. 60-69%
9. 70-79%
10. 80-89%
11. 90-99%
12. 100% - all of my time
13. Don't know

**IF DELIVERING TRAINING TO OTHERS (CODES 2, 3, 4, 5, 6, 7, 8, 9, 10, 11, 12)**

**Q30 To which of the following groups do you deliver training to?**

**MULTICODE**

1. Patient groups
2. Students in your organisation
3. General staff in your organisation
4. Those in Higher Education Institutions
5. Others working in advance clinical practice roles

18-090780-01 HEE – Questionnaire 4 ACPs

6. Other – please write in (SPECIFY)

**IF DELIVERING LEARNING TO OTHERS Q30 – CODE 4, 5 and 6**

**Q31 Thinking about the training you deliver external to your organisation, do you consider yourself to be...**

1. A visiting lecturer
2. A subject area expert
3. Something else – please write in (SPECIFY)
4. None of these
5. Not applicable

**Research**

The next section is about research in which you may be involved.

**ASK ALL**

**Q32 In which, if any, of the following areas of research are you involved?**

**MULTICODE**

1. Quality improvement
2. Service evaluation
3. Economic evaluation of practice
4. Research
5. Audit
6. Other – please write in (SPECIFY)
7. None of these
8. Don't know

**ASK ALL**

**Q33 Have you presented or shared your work in any of the following ways....**

**This could be either verbally or in writing.**

1. Within your organisation / trust
2. Locally
3. Nationally
4. Peer reviewed journal
5. Internationally
6. I have not presented or shared my work
7. Don't know

**IF CODED 4 AT Q33**

**Q33A**

**Please can you state which peer reviewed journal, and provide the online link?**

**Providing an answer to this question may make you identifiable to Health Education England. If you would like to remain anonymous please select prefer not to say**

**OPEN ENDED**

1. It has not been published yet
2. Prefer not to say

**ASK ALL**

**Q34 To what extent would you be happy or not to share your learnings and evaluation with HEE?**

1. Very happy

18-090780-01 HEE – Questionnaire 4 ACPs

2. Fairly happy
3. Not very happy
4. Not at all happy
5. Don't know

### **Advanced Clinical Practice**

The next section is about advanced clinical practice for advanced clinical practitioners, including consultants.

#### **ASK ALL**

**Q35 Typically, what proportion of your average working week is spent on all patient facing related activity? This includes direct and indirect contact with patients.**

1. 0% - I spend no time on patient facing related activity
2. 1-9%
3. 10-19%
4. 20-29%
5. 30-39%
6. 40-49%
7. 50-59%
8. 60-69%
9. 70-79%
10. 80-89%
11. 90-100%
12. It varies too much to say
13. Don't know

#### **ASK ALL**

**Q36 Did you take a portfolio route or an academic route to get to your current level of advanced clinical practice?**

1. Portfolio route
2. Academic route
3. Both portfolio route and academic route
4. Don't know

#### **IF CODED 1 AND 3 AT Q36**

**Q37 Can you please tell me what education and training accredited or non-accredited courses you have taken to build your portfolio?**

**OPEN ENDED**

1. Don't know

#### **IF CODED 2 AND 3 AT Q36**

**Q38 What is your highest level of qualification?**

1. Undergraduate degree or equivalent
2. Master's degree or equivalent
3. PhD
4. Other – please write in (SPECIFY)

#### **ASK ALL**

**Q39 What, if any, funding did you personally receive for your <<INSERT ANSWER FROM Q38>>**

**MULTICODE**

1. I did not receive any funding – I self-funded (SINGLE CODE)

18-090780-01 HEE – Questionnaire 4 ACPs

2. My employer/another paid for 100% of the costs (SINGLE CODE)
3. My employer/another paid towards some of the costs but also had to contribute myself
4. Other
5. Prefer not to say

**ASK ALL**

**Q40 How many months and years have you been working as a fully trained advanced level practitioner?**

**ENTER YEARS AND MONTHS**

1. I am still in training

**ASK IF YEARS AND MONTHS ENTERED AT Q40**

**Q41 How long did your training take to allow you to work in advanced practice?**

**ENTER YEARS AND MONTHS**

### **Leadership & management**

The next section is about leadership and management.

**ASK ALL**

**Q42A**

**What proportion of your average week is typically spent leading on....**

- a) Service provision and innovation
- b) People management

**ENTER PROPORTION OF TIME**

1. None of the time
2. 1-9%
3. 10-19%
4. 20-29%
5. 30-39%
6. 40-49%
7. 50-59%
8. 60-69%
9. 70-79%
10. 80-89%
11. 90-100%
12. Don't know

**ASK ALL**

**Q43 What support, if any, have you been given by your organisation to help you develop your leadership and management skills? Support from...**

**MULTICODE**

1. Others in the team I work in
2. Department level
3. Service/Speciality level
4. Organisation wide
5. Other – please write in (SPECIFY)
6. None of these
7. Don't know

**ASK ALL**

18-090780-01 HEE – Questionnaire 4 ACPs

**Q44 What support, if any, have you been given by organisations outside your trust to help you develop your leadership and management skills?**

**MULTICODE**

1. Leadership Academy programme
2. Mentoring or coaching
3. Shadowing others trained in advanced clinical practice
4. Structured reflective learning
5. Action learning sets
6. Leadership Fellowship e.g. Darzi
7. Other – please write in (SPECIFY)
8. None of these
9. Don't know

**Competency framework and supervision**

The next few questions are about competency frameworks and supervision.

**ASK ALL FOR MAIN EMPLOYER ONLY (EXCLUDE FROM LOOP)**

**Q45 Which, if any, of these do you have which are related to your job?**

**MULTICODE**

1. Competency Framework
2. Personal Development plan
3. Neither a Competency Framework or a Personal Development plan
4. Other – please write in (Specify)
5. Don't know

**ASK ALL**

**Q46 Which, if any, of the following do you have in your job role?**

**MULTICODE**

1. Appraisals
2. Educational supervision for trainees
3. Clinical supervision (e.g. mentoring and coaching on the job in their clinical practice)
4. Regular one to one with line managers to support role development
5. None of these
6. Don't know

**REPEAT FOR EACH OPTION SELECTED AT Q46**

**Q47 – From whom do you receive your <<TEXT SUBSTITUTE FROM Q46>>**

**MULTICODE**

1. Operational lead
2. Professional lead
3. Clinical lead medical
4. Clinical lead non-medical – please write in (SPECIFY)
5. Senior Advanced Care Practitioner
6. Other – please write in (SPECIFY)
7. None of these
8. Don't know

**REPEAT FOR EACH OPTION SELECTED AT Q46**

**Q48 Typically, how often do you receive your <<TEXT SUBSTITUTE FROM Q46>>**

1. Daily
2. Weekly

18-090780-01 HEE – Questionnaire 4 ACPs

3. Monthly
4. Annually
5. Less often
6. Don't know

**IF CODED 1, 2, 3, 4 AT YES AT Q46**

**Q49 How much formal guidance are you receiving from your supervisor?**

1. A great deal
2. A fair amount
3. Hardly any
4. None
5. Don't know

**IF CODED 1, 2, 3, 4 AT YES AT Q46**

**Q50A Is there a formal guidance structure for your supervision?**

1. Yes
2. No

**IF CODED 1 AT Q50A**

**Q50B Who provides the formal guidance structure for your supervision?**

1. Higher Education Institution
2. Organisation / trust
3. Service
4. Professional group
5. Other – please write in (SPECIFY)
6. Don't know

### **Governance**

The final section is about Governance.

**ASK ALL**

**Q51 Does your organisation have any of the following?**

**MULTICODE**

1. Lead for advanced practice
2. Forum or meetings where professionals for different groups can come together to discuss advanced practice
3. Organisation policy on advanced practice
4. None of these
5. Don't know

**ASK ALL WHO CODED 2 – 9 AT Q1 AND SELECTED CODES AS MAIN EMPLOYER**

**Q52 To whom does the person who leads on advanced clinical practice report into?**

1. Trust board
2. Governance group
3. Workforce committee
4. Other – please write in (SPECIFY)
5. The person leading on advanced clinical practice does not report to anyone else
6. Don't know

18-090780-01 HEE – Questionnaire 4 ACPs

**ASK ALL WHO CODED 1 AT Q1 AND SELECTED PRIMARY CARE AS MAIN EMPLOYER**  
**Q60 To whom does the person who leads on advanced clinical practice report into?**

**OPEN ENDED.**

1. Don't know

**ASK ALL**

**Q53 Is there any other information that you would like to share about your experience of working in advanced practice?**

**Please note - by providing an answer to this question you may make yourself identifiable to Health Education England. If you do not wish to answer this question, please select "prefer not to say".**

**OPEN ENDED**

1. I have nothing else to add
2. Prefer not to say

### **Demographics**

We would now like to ask a few questions about yourself. These questions are for analysis purposes only.

**Q59 Who invited you to take part in this survey?**

1. Peer/colleague
2. Manager/team lead
3. Professional lead
4. Organisational lead
5. Other
6. Don't know/can't remember

**ASK ALL**

**Q54A Are you registered with a Statutory regulatory body?**

1. NMC, HCPC etc
2. Voluntary register
3. Not on any
4. Don't know

**ASK ALL**

**Q54B Which of the following describes how you think of yourself ....**

**Please note - by providing an answer to this question you may make yourself identifiable to Health Education England. If you do not wish to answer this question, please select 'prefer not to say'.**

1. Male
2. Female
3. In another way
4. Prefer not to say



18-090780-01 HEE – Questionnaire 4 ACPs

**ASK ALL**

**Q55 What is your age?**

**Please note - by providing an answer to this question you may make yourself identifiable to Health Education England. If you do not wish to answer this question, please select 'prefer not to say'.**

OPEN ENDED

1. Prefer not to say

**IF REFUSED AT Q55**

**Q55A What is your age?**

**If refused probe for age bands**

1. 18-24
2. 25-34
3. 35-44
4. 45-54
5. 55-64
6. 65+
7. Prefer not to say

**IF MORE THAN ONE EMPLOYER SELECTED ASK Q57 ONCE AT END OF LOOP(S).**

**Q57 Re-contact Question**

Thank you for taking part in this survey.

Health Education England or an agency working on behalf of HEE (such as Ipsos MORI) may want to get in contact with those who have responded to this survey for the purpose of inviting them to take part in follow up research as part of this project within the next 12 months.

If you are willing to be contacted as part of this project we will need to collect some contact details. All details provided will be treated in the strictest confidence, held only for 12 months by HEE, and will only be used to invite you to take part in further research as part of this project.

Are you willing to provide your contact details to HEE so that they, or an agency working on their behalf, can contact you within the next 12 months for this purpose?

1. Yes – COLLECT CONTACT DETAILS – NAME & EMAIL ADDRESS.
2. No

**IF YES AT Q34**

**Q58 You previously agreed that you were happy to share your learnings and evaluations with HEE. Are you happy for someone on behalf of HEE to contact you about this?**

1. Yes – COLLECT CONTACT DETAILS – NAME & EMAIL ADDRESS (IF NOT CODED 1 AT Q57)
2. No

**Thank and close.**
